# Supplementary material
Source: ML conference proceedings conference paper supplement (https://proceedings.mlr.press/v80/mussmann18a.html)
Supplement: Supplementary file 1 [file mussmann18a-supp.pdf]

## 6. Appendix

### 6.1. Notation

$w_0$  is the weights after the seed round.

$A_{-1}$  is the matrix without the first row and column.  $A_{1,-1}$  is the vector from the first row and all columns except the first column.

Generally, the  $O(f(n))$  notation hides constants that only depend on the dataset, such as  $\|w^*\|$ ,  $s$ ,  $B$ , etc.

For the order of things going to zero, we first choose  $\alpha$  to be small, then  $r$  to be small, then  $n$  to be large.

$w_0$  is weight vector after seed round

$$\epsilon_{\text{active}}(n) = \mathbb{E}_{f \sim \text{active}, n \text{ points}}[\text{Err}(f)]$$

$$\epsilon_{\text{passive}}(n) = \mathbb{E}_{f \sim \text{passive}, n \text{ points}}[\text{Err}(f)]$$

$$DE(\epsilon) = \frac{\max\{n : \epsilon_{\text{passive}}(n) \geq \epsilon\}}{\max\{n : \epsilon_{\text{active}}(n) \geq \epsilon\}} = \frac{n_{\text{passive}}(\epsilon)}{n_{\text{active}}(\epsilon)}$$

Without loss of generality, assume  $w^* = \|w^*\|e_1$ ,  $w_0^* = 0$ , and  $\mathbb{E}[x_{2:}] = 0$ .

With an abuse of notation, let  $\sigma = \sigma(w^* \cdot x) = \sigma(\|w^*\|x_1)$ .

### 6.2. Losses

Define  $\sigma(x) = \frac{1}{1 + \exp(-x)}$ .

The loss (negative log-likelihood) for a single data point under logistic regression is

$$l_w(x, y) = \log(1 + \exp(-w \cdot yx))$$

and so the gradient is

$$\nabla l_w(x, y) = -\frac{yx \exp(-w \cdot yx)}{1 + \exp(-w \cdot yx)} = -yx\sigma(-w \cdot yx)$$

and the Hessian is

$$\begin{aligned} \nabla^2 l_w(x, y) &= \frac{(yx)(yx)^T \exp(w \cdot yx)}{(1 + \exp(w \cdot yx))^2} \\ &= \frac{xx^T}{(1 + \exp(w \cdot yx))(1 + \exp(-w \cdot yx))} \\ &= \sigma(w \cdot yx)\sigma(-w \cdot yx)xx^T \end{aligned}$$

Note that  $\sigma(-x) = 1 - \sigma(x)$ .

### 6.3. Decision Boundary

**Lemma 6.1.** For sufficiently small  $r$ , if  $\|w' - w^*\|_2 \leq 2r$ , then

$$\left| \int_{w' \cdot x=0} p(x) - \int_{w^* \cdot x=0} p(x) \right| = O(r)$$

*Proof.* Without loss of generality (rotation and translation), let  $w_0^* = 0$ ,  $w^* = \|w^*\|e_1$  and let  $w' = w'_1e_1 + w'_2e_2$ .

We sample from places where  $w'_0 + w'_1x_1 + w'_2x_2 = 0$  which occurs when  $x_1 = \frac{w'_2}{w'_1}x_2 + \frac{w'_0}{w'_1} = ax_2 + b$ . From the theorem assumption, we know that  $|w'_0|, |w'_2| \leq r$  and  $|w'_1| \geq \|w^*\| - r \geq \frac{1}{2}\|w^*\|$  (for sufficiently small  $r$ ) so we know that  $|a|, |b| \leq O(r)$

Note that

$$\left| \int_{w'.x=0} p(x) - \int_{w^*.x=0} p(x) \right| = \left| \int_x p(x_1 = ax + b, x_2 = x) - p(x_1 = 0) \right|$$

(Note that the Jacobian of the change of variables has the following matrix which has determinant 1)

$$\begin{bmatrix} 1 & 0 \\ -a & 1 \end{bmatrix}$$

$$\left| \int_{w'.x=0} p(x) - \int_{w^*.x=0} p(x) \right| \leq \int_x |p(x_1 = ax + b|x_2 = x) - p(x_1 = 0|x_2 = x)| p(x_2 = x)$$

With the assumption that the conditional probabilities are Lipschitz,

$$\begin{aligned} &\leq \int_x L|ax + b| p(x_2 = x) \\ &\leq aLB + bL \\ &= O(r) \end{aligned}$$

□

**Lemma 6.2.** *For sufficiently small  $r$ , if  $\|w_0 - w^*\|_2 \leq r$ , then with probability going to 1 exponentially fast, all points from two-stage uncertainty sampling are from some hyperplane  $w'$  such that  $\|w' - w^*\| \leq 2r$ .*

*Proof.* For small enough  $r$ , then  $\int_{w'.x=0} p(x) > p_0/2$  from the above lemma if  $\|w_0 - w^*\|_2 \leq 2r$ . Thus, the probability of an unlabeled point within the parallel plane with bias less than  $r$  different from  $w_0$  such that  $\|w' - w_0\|_2 \leq r$  is at least  $2 \frac{r}{\|w_0\|} (p_0/2) \geq \frac{rp_0}{2\|w^*\|} = \Theta(r)$  (for sufficiently small  $r$ ).

Recall that  $n_{\text{pool}} = \omega(n)$  and  $n_{\text{seed}} = o(n)$ .

For sufficiently large  $n$ , the probability of at least  $n$  points from the  $n_{\text{pool}} - n_{\text{seed}}$  unlabeled points falling in this range is

$$\begin{aligned} \Pr[\text{Binomial}(n_{\text{pool}} - n_{\text{seed}}, \text{probability of falling}) \geq n] &\geq \\ \Pr[\text{Binomial}(n_{\text{pool}}/2, C_1 r) \geq n] & \end{aligned}$$

for some constant  $C_1$ .

We can use a Chernoff bound (standard with  $\delta = 1/2$ ) since  $n_{\text{pool}} = \omega(n)$  to bound by  $\exp(-\omega(n))$ . Thus the probability that the planes we choose from are farther than  $r$  away from  $w_0$  goes to 0 with rate faster than  $\exp(-n)$ . □

## 6.4. Convergence

**Lemma 4.2.** *Both two-stage uncertainty sampling and random sampling converge to  $w^*$ .*

*Proof.* For passive learning, the Hessian of the population loss is positive definite because the data covariance is non-singular (Assumption 8). Thus, the population loss has a unique optimum. By the definition of  $w^*$ ,  $w^*$  is the minimizer. Since the sample loss converges to the population loss, the result of passive learning converges to  $w^*$ .

By a similar argument, the weight vector  $w_0$  after the seed round converges to  $w^*$  since  $n_{\text{seed}}$  is super-constant (Assumption 2). Thus, for any  $r > 0$ , with probability converging to 1 as  $n \rightarrow \infty$ ,  $\|w_0 - w^*\| \leq r \leq \lambda/2$ . By Lemma 6.2, with probability going to 1, all points selected are from hyperplanes  $w$  where  $\|w - w^*\| \leq 2r \leq \lambda$ . Thus, by Assumption 5,  $\mathbb{E}_{w \cdot x=0}[\nabla l_{w^*}(x, y)] = 0$ . In the second stage, because of the  $\alpha$  proportion of randomly selected points, the loss from the new uncertainty sampling population has a unique optimum. And because the expectation of the gradient of the loss is 0 for the points near the decision boundary (with probability going to 1), the result of two-stage uncertainty sampling converges in probability to  $w^*$ .  $\square$

### 6.5. Rates

**Lemma.** *If  $\Sigma$  exists, and for any  $\epsilon > 0$ ,  $n \Pr[\|A_n - A\| \geq \epsilon] \rightarrow 0$  and  $n \Pr[\|w_n - w^*\| \geq \epsilon] \rightarrow 0$ , then there exist vectors  $c_k \neq 0$  that depend only on the data distribution such that,*

$$n(\epsilon(n) - Err) \rightarrow \sum_k c_k^T \Sigma^{-1} c_k$$

*Proof.* The zero-one error is

$$Z(w_n) = \Pr[yx \cdot w_n < 0]$$

Since  $Z$  is twice differentiable at  $w^*$ , by Taylor's theorem,

$$Z(w_n) = Z(w^*) + (\nabla Z(w^*))^T (w_n - w^*) + (w_n - w^*)^T \left(\frac{1}{2} \nabla^2 Z(w^*)\right) (w_n - w^*) + (w_n - w^*)^T R(w_n - w^*) (w_n - w^*)^T$$

where  $R(w) \rightarrow 0$  as  $w \rightarrow 0$ .

Since  $Z$  has a local optimum at  $w^*$ ,  $\nabla Z(w^*) = 0$ . Also  $Z(w^*) = Err$ . Additionally, denote  $H = \frac{1}{2} \nabla^2 Z(w^*)$ ,

$$Z(w_n) = Err + (w_n - w^*)^T (H + R(w_n - w^*)) (w_n - w^*)$$

Choose any  $\epsilon > 0$ . Since  $R(w) \rightarrow 0$  as  $w \rightarrow 0$ , there is  $\delta_\epsilon$  such that  $\|w\| \leq \delta_\epsilon \implies \|R(w)\| \leq \epsilon$ . Define  $near(n)$  to be the event that  $\|A_n - A\| \geq \epsilon \wedge \|w_n - w^*\| \geq \delta_\epsilon$ . Note that from the theorem assumption,  $n \Pr[\neg near(n)] \rightarrow 0$ .

$$\epsilon(n) = \mathbb{E}[Z(w_n)] = \Pr[\neg near(n)] \mathbb{E}[Z(w_n) | \neg near(n)] + \Pr[near(n)] \mathbb{E}[Z(w_n) | near(n)]$$

$$\begin{aligned} |n\epsilon(n) - n\mathbb{E}[Z(w_n) | near(n)]| &\leq n \Pr[\neg near(n)] |\mathbb{E}[Z(w_n) | \neg near(n)] - \mathbb{E}[Z(w_n) | near(n)]| \\ &\leq n \Pr[\neg near(n)] \rightarrow 0 \end{aligned}$$

Thus,

$$n(\epsilon(n) - Err) \rightarrow n(\mathbb{E}[Z(w_n) | near(n)] - Err)$$

So we need to just worry about the convergence of the right side,

$$\mathbb{E}[Z(w_n) | near(n)] = Err + \frac{1}{n} \mathbb{E}[(A_n^{-1} b_n)^T (H + R(w_n - w^*)) (A_n^{-1} b_n) | near(n)]$$

$$n(\mathbb{E}[Z(w_n) | near(n)] - Err) = \mathbb{E}[b_n^T A_n^{-1} (H + R(w_n - w^*)) A_n^{-1} b_n | near(n)]$$

Because we conditioned on  $near(n)$ ,  $\|A_n - A\| \leq \epsilon$  and  $\|w_n - w^*\| \leq \delta_\epsilon$  and therefore  $\|R(w_n - w^*)\| \leq \epsilon$ . So  $\|A_n^{-1}(H + R(w_n - w^*))A_n^{-1} - A^{-1}HA^{-1}\| = O(\epsilon)$ . Using this, we get,

$$\begin{aligned} \|n(\mathbb{E}[Z(w_n)|near(n)] - Err) - \mathbb{E}[b_n^T A^{-1} H A^{-1} b_n | near(n)]\| &\leq \|\mathbb{E}[b_n^T O(\epsilon) b_n | near(n)]\| \\ &\leq O(\epsilon) \|\mathbb{E}[\|b_n\|^2 | near(n)]\| \\ &\leq O(\epsilon) \|\mathbb{E}[b_n b_n^T | near(n)]\| \end{aligned}$$

Note that,

$$\mathbb{E}[b_n b_n^T] = \mathbb{E}[b_n b_n^T | near(n)] \Pr[near(n)] + \mathbb{E}[b_n b_n^T | \neg near(n)] \Pr[\neg near(n)]$$

and the later two expectations exist since the left exists and the matrices are positive semidefinite. Passing through the limit, we see that  $\mathbb{E}[b_n b_n^T | near(n)] \rightarrow B$ .

Thus, noting that we can drive  $\epsilon \rightarrow 0$ ,

$$\begin{aligned} n(\mathbb{E}[Z(w_n)|near(n)] - Err) &\rightarrow \mathbb{E}[b_n^T A^{-1} H A^{-1} b_n | near(n)] \\ &\rightarrow \sum_{i,j} [A^{-1} H A^{-1}]_{i,j} \mathbb{E}[b_n b_n^T | near(n)]_{i,j} \\ &\rightarrow \sum_{i,j} [A^{-1} H A^{-1}]_{i,j} B_{i,j} \end{aligned}$$

Thus, putting this together, we see that

$$n(\epsilon(n) - Err) \rightarrow \sum_{i,j} [A^{-1} H A^{-1}]_{i,j} B_{i,j}$$

Doing manipulations on the indices, we find,

$$\begin{aligned} \sum_{i,j} [A^{-1} H A^{-1}]_{i,j} B_{i,j} &= \sum_{i,j} H_{i,j} (A^{-1} B A^{-1})_{i,j} \\ &= \sum_{i,j} H_{i,j} \Sigma_{i,j} \end{aligned}$$

Therefore,

$$n(\epsilon(n) - Err) \rightarrow \sum_{i,j} H_{i,j} \Sigma_{i,j}$$

and we are most of the way there, just need to use some properties to show the final form.

Since  $w^*$  is a local optimum,  $H \succeq 0$  (and symmetric) and since the Hessian is not identically zero at  $w^*$ ,  $H \neq 0$ .

Without loss of generality, let  $w^* = \|w^*\|e_1$  and  $w_0^* = 0$  as assumed before. Note that  $Z(w^* + \alpha e_1) = Z(w^*)$  for  $\alpha \in (-\|w^*\|/2, \infty)$ . Since it is constant along this line,  $(\nabla^2 Z(w^*))_{1,1} = 0$ , and so  $H_{1,1} = 0$

So  $H \succeq 0$ ,  $H$  is symmetric,  $H \neq 0$ , and  $H_{1,1} = 0$ . Since  $H \succeq 0$  and  $H_{1,1} = 0$ ,  $H_{1,i} = 0$  for all  $i$ .

Since  $H \succeq 0$  and  $H \neq 0$ ,

$$H = \sum_k c_k c_k^T$$

for some vectors  $c_k$  (where there is at least one). And further,  $(c_k)_1 = 0$ .

$$\begin{aligned}\sum_{i,j} H_{i,j} \Sigma_{i,j} &= \sum_{i,j} \left( \sum_k c_k c_k^T \right)_{i,j} \Sigma_{i,j} \\ &= \sum_k c_k^T \Sigma c_k\end{aligned}$$

We can remove the first elements of  $c_k$  and the first row and column of  $\Sigma$  without changing anything, so

$$\sum_{i,j} H_{i,j} \Sigma_{i,j} = \sum_k c_k^T \Sigma_{-1} c_k$$

And thus the theorem is proved. □

**Lemma.** *If we have two algorithms  $a$  and  $b$  that satisfy the conditions of Lemma 2, and*

$$\Sigma_{a,-1} \succ c \Sigma_{b,-1}$$

*then there exists  $\epsilon_0$  such that for  $Err < \epsilon < \epsilon_0$ ,*

$$n_a(\epsilon) \geq c n_b(\epsilon)$$

*Proof.*

$$\Sigma_{a,-1} \succ \alpha \Sigma_{b,-1}$$

$$\sum_k c_k^T \Sigma_{a,-1} c_k > \alpha \sum_k c_k^T \Sigma_{b,-1} c_k$$

so, for  $n > n_0, n' > n_0$ ,

$$n(\epsilon_a(n) - Err) > \alpha n'(\epsilon_b(n') - Err)$$

setting  $n' = n/\alpha$  and for  $n > \max(n_0, n_0/\alpha)$ ,

$$n(\epsilon_a(n) - Err) > n(\epsilon_b(n/\alpha) - Err)$$

So for sufficiently large  $n$ ,

$$\epsilon_a(n) > \epsilon_b(n/\alpha)$$

For any  $\epsilon > Err$  such that  $n_a(\epsilon)$  is sufficiently large, (we know this exists since  $n_a(\epsilon) = \Theta(\frac{1}{\epsilon - Err})$ )

$$\begin{aligned}\epsilon_a(n) &\leq \epsilon \text{ for } n \geq n_a(\epsilon) \\ \epsilon_b(n/\alpha) &\leq \epsilon \text{ for } n \geq n_a(\epsilon) \\ \epsilon_b(n') &\leq \epsilon \text{ for } n' \geq \frac{1}{\alpha} n_a(\epsilon) \\ n_b(\epsilon) &\leq \frac{1}{\alpha} n_a(\epsilon) \\ n_a(\epsilon) &\geq \alpha n_b(\epsilon)\end{aligned}$$

□

**Lemma 4.1.** *If we have two algorithms with  $\Sigma_a$  and  $\Sigma_b$ , and for any  $\epsilon > 0$  and both estimators,  $n \Pr[\|A_n - A\| \geq \epsilon] \rightarrow 0$  and  $n \Pr[\|w_n - w^*\| \geq \epsilon] \rightarrow 0$ , then*

$$\Sigma_{a,-1} \succ c\Sigma_{b,-1}$$

implies that for some  $\epsilon_0$  and any  $\text{Err} < \epsilon < \epsilon_0$ ,

$$n_a(\epsilon) \geq cn_b(\epsilon)$$

*Proof.* This is a straightforward application of the above lemmas, Lemma 2 and Lemma 3. □

### 6.6. Conditions satisfied

**Lemma 4.3.** *For our active and passive learning algorithms, for any  $\epsilon > 0$ ,  $n \Pr[\|A_n - A\| \geq \epsilon] \rightarrow 0$  and  $n \Pr[\|w_n - w^*\| \geq \epsilon] \rightarrow 0$*

*Proof.* Recall that

$$A_n = \frac{1}{n} \sum_i \nabla^2 l_{w'}(x_i, y_i)$$

$$b_n = \frac{1}{\sqrt{n}} \sum_i \nabla l_{w^*}(x_i, y_i)$$

where  $\|w' - w^*\| \leq \|w_n - w^*\|$ .

For passive learning, by CLT, for any  $\epsilon$ ,  $\Pr[\|w_n - w^*\| > \epsilon] = O(\frac{e^{-\Theta(n)}}{\sqrt{n}})$ . Thus, we find that  $n \Pr[\|w_n - w^*\| \geq \epsilon] \rightarrow 0$ .

We also need this fact to bound  $w'$ . Then, with a Hoeffding bound on the sum of  $A_n$ , we can get that  $\Pr[\|A_n - A\| \geq \epsilon] = O(\frac{e^{-\Theta(n)}}{\sqrt{n}})$  and thus  $n \Pr[\|A_n - A\| \geq \epsilon] \rightarrow 0$ .

For active learning, we need to be careful because if  $\|w_0 - w^*\| > \lambda/2$ , we are not even guaranteed that the final result converges (see Lemma 6.2). However, by the CLT, we find that  $\Pr[\|w_0 - w^*\| > \lambda/2] = O(\frac{e^{-\Theta(n_{\text{seed}})}}{\sqrt{n_{\text{seed}}}})$ . Because  $n_{\text{seed}} = \Omega(n^\rho)$  (see Assumption 2), this converges exponentially fast and  $n \Pr[\|w_0 - w^*\| > \lambda/2] \rightarrow 0$ .

Because of the  $\alpha$  random sampling, and conditioned on the probability that  $\|w_0 - w^*\| < \lambda/2$ , we can get the same results for active learning as for passive learning. Note that from Lemma 6.2, there is exponentially small probability of not sampling all points from  $w'$  where  $\|w' - w^*\| < \lambda$ . □

### 6.7. COV calculation for passive

**Lemma 6.3.** *For passive learning,  $\mathbb{E}[\nabla l_{w^*}(x, y)(\nabla l_{w^*}(x, y))^T] = \mathbb{E}[\sigma(1 - \sigma)xx^T]$ .*

*Proof.* Since the mean of the derivative of the loss is 0 at  $w^*$ ,

$$\begin{aligned} \mathbb{E}[\nabla l_{w^*}(x, y)(\nabla l_{w^*}(x, y))^T]_{i,j} &= \mathbb{E}[x_i x_j \sigma(-\|w^*\| y x_1)^2] \\ &= \mathbb{E}_{x_1}[\mathbb{E}[x_i x_j | x_1] \mathbb{E}[\sigma(\|w^*\| y x_1)^2 | x_1]] \\ &= \mathbb{E}_{x_1}[\mathbb{E}[x_i x_j | x_1] [P(y = 1 | x_1) \sigma(-\|w^*\| x_1)^2 + P(y = -1 | x_1) \sigma(\|w^*\| x_1)^2]] \end{aligned}$$

from the calibrated assumption,

$$\begin{aligned}
 &= \mathbb{E}_{x_1}[\mathbb{E}[x_i x_j | x_1][\sigma(\|w^*\|x_1)\sigma(-\|w^*\|x_1)^2 + \sigma(-\|w^*\|x_1)\sigma(\|w^*\|x_1)^2]] \\
 &= \mathbb{E}_{x_1}[\mathbb{E}[x_i x_j | x_1]\sigma(\|w^*\|x_1)\sigma(-\|w^*\|x_1)[\sigma(\|w^*\|x_1) + \sigma(\|w^*\|x_1)]] \\
 &= \mathbb{E}_{x_1}[\mathbb{E}[x_i x_j | x_1]\sigma(\|w^*\|x_1)\sigma(-\|w^*\|x_1)] \\
 &= \mathbb{E}[x_i x_j \sigma(\|w^*\|x_1)\sigma(-\|w^*\|x_1)] \\
 &= \mathbb{E}[\sigma(1 - \sigma)xx^T]_{i,j}
 \end{aligned}$$

□

**Lemma 4.4.**

$$\Sigma_{passive} = [\mathbb{E}[\sigma(1 - \sigma)xx^T]]^{-1}$$

*Proof.* For passive learning, by the convergence of  $w^n \rightarrow w^*$  and by the law of large numbers,

$$A_n \rightarrow A = \mathbb{E}[\sigma(1 - \sigma)xx^T]$$

Further, by independence of draws,

$$\mathbb{E}[b_n b_n^T] = \mathbb{E}[\nabla l_{w^*}(x, y)(\nabla l_{w^*}(x, y))^T]$$

so by Lemma 6.3,

$$\begin{aligned}
 \mathbb{E}[b_n b_n^T] &= \mathbb{E}[\sigma(1 - \sigma)xx^T] \\
 B &= \mathbb{E}[\sigma(1 - \sigma)xx^T] \\
 B &= A
 \end{aligned}$$

Thus,

$$\begin{aligned}
 \Sigma_{passive} &= A^{-1}BA^{-1} \\
 &= A^{-1} \\
 &= [\mathbb{E}[\sigma(1 - \sigma)xx^T]]^{-1}
 \end{aligned}$$

□

**6.8. COV calculation for active**

**Lemma 6.4.** For sufficiently small  $r$  (small with respect to dataset-only dependent constants), if  $\|w' - w^*\|_2 \leq 2r$ , then

$$\|\mathbb{E}_{w'.x=0}[\sigma(1 - \sigma)xx^T] - \mathbb{E}_{w^*.x=0}[\sigma(1 - \sigma)xx^T]\| = O(r)$$

and

$$\|\mathbb{E}_{w'.x=0}[\sigma(-yx_1\|w^*\|)^2 xx^T] - \mathbb{E}_{w^*.x=0}[\sigma(-yx_1\|w^*\|)^2 xx^T]\| = O(r)$$

*Proof.* Without loss of generality (rotation and translation), let  $w'_0 = 0$ ,  $w^* = \|w^*\|e_1$  and let  $\hat{w} = c_1 e_1 + c_2 e_2$ .

We sample from places where  $w'_0 + w'_1 x_1 + w'_2 x_2 = 0$  which occurs when  $x_1 = \frac{w'_2}{w'_1} x_2 + \frac{w'_0}{w'_1} = ax_2 + b$ . From the theorem assumption, we know that  $|w'_0|, |w'_2| \leq r$  and  $|w'_1| \geq \|w^*\| - r \geq \frac{1}{2}\|w^*\|$  (for sufficiently small  $r$ ) so we know that  $|a|, |b| \leq O(r)$

Define  $Q(x_1) = \sigma(\|w^*\|x_1)\sigma(-\|w^*\|x_1)$  or  $Q(x_1) = \sigma(-yx_1\|w^*\|)^2$  (abuse of notation). Both these functions are Lipschitz around  $x_1 = 0$ , and bounded (since support bounded by  $B$ ).

First, we compute the joint (not the conditionals) and then we can divide by the marginals from the previous lemma,

Let  $i_1, i_2, \dots, i_d$  be indicators for the indices  $i, j$  that are non-zero. Thus,  $i_1 + i_2 + \dots + i_d \leq 2$ ,

$$\begin{aligned} & \mathbb{E}_{w'.x=0}[\sigma(1-\sigma)xx^T]_{i,j} = \\ & = \mathbb{E}_{w'.x=0}[Q(x_1)(x_1)^{i_1}(x_2)^{i_2}(x_3)^{i_3}\dots] = \end{aligned}$$

(As before, the Jacobian of the change of variables has determinant 1)

$$\begin{aligned} & \int_x p(x_1 = ax + b, x_2 = x)Q(ax + b)(ax + b)^{i_1}(x)^{i_2}\mathbb{E}[x_3^{i_3}\dots|x_1 = ax + b, x_2 = x] = \\ & = \int_x p(x_2 = x)(x)^{i_2}F(ax + b, x) \end{aligned}$$

where  $F(x_1, x_2) = p(x_1|x_2)(Q(x_1)x_1^{i_1})\mathbb{E}[x_3^{i_3}\dots|x_1, x_2]$

All three components of  $F$  are bounded, since support bounded, Assumption 3. Further, all three components are Lipschitz, because of Assumption 4 and bounded support as well. Therefore,  $F$  is Lipschitz.

$$\begin{aligned} & \left| \int_x p(x_2 = x)(x)^{i_2}F(ax + b, x) - \int_x p(x_2 = x)(x)^{i_2}F(0, x) \right| \\ & \leq \int_x p(x_2 = x)|x|^{i_2}L|ax + b| \\ & \leq aLB^{i_2+1} + bLB^{i_2} \\ & = O(r) \end{aligned}$$

Thus, for any  $i, j$ ,

$$\|\mathbb{E}_{w'.x=0}[Qxx^T]_{i,j} - \mathbb{E}_{w^*.x=0}[Qxx^T]_{i,j}\| = O(r)$$

We can use this to bound the matrix norm,

$$\|\mathbb{E}_{w'.x=0}[Qxx^T] - \mathbb{E}_{w^*.x=0}[Qxx^T]\| = O(r)$$

Since the probabilities (see Lemma 6.1) and conditionals are both off by only  $O(r)$  (from above) and since the probabilities are bounded away from 0 (see Lemma 6.1 and Assumption 8), the conditional distribution is off by  $O(r)$ . We can plug in both functions of  $Q$  to get the statement of the theorem.  $\square$

**Lemma 4.5.**

$$\Sigma_{active} = [(1-\alpha)\mathbb{E}_{x_1=0}[\sigma(1-\sigma)xx^T] + \alpha\mathbb{E}[\sigma(1-\sigma)xx^T]]^{-1}$$

*Proof.* Because  $w_n \rightarrow w^*$ , and by the law of large numbers,

$$A_n \rightarrow (1-\alpha)\mathbb{E}_{w'}[\mathbb{E}_{w'.x=0}[\sigma(-yx_1\|w^*\|)^2xx^T]] + \alpha\mathbb{E}[\sigma(-yx_1\|w^*\|)^2xx^T]$$

From Lemma 6.4,



$$\|\mathbb{E}_{w',x=0}[\sigma(1-\sigma)xx^T] - \mathbb{E}_{w^*,x=0}[\sigma(1-\sigma)xx^T]\| = O(r)$$

and  $\|w' - w^*\| < 2r$  with probability going to 1,

$$A_n \rightarrow \frac{n - n_{\text{seed}}}{n} [(1 - \alpha)\mathbb{E}_{w^*,x=0}[\sigma(1 - \sigma)xx^T] + O(r) + \alpha\mathbb{E}[\sigma(1 - \sigma)xx^T]]$$

Since  $w_0 \rightarrow w^*$ ,  $r \rightarrow 0$ , and since  $n_{\text{seed}} = o(n)$  (see Assumption 2) so

$$A_n \rightarrow A = (1 - \alpha)\mathbb{E}_{w^*,x=0}[\sigma(1 - \sigma)xx^T] + \alpha\mathbb{E}[\sigma(1 - \sigma)xx^T]$$

The same line of argument with using Lemma 6.4 and Lemma 6.3 yields

$$B = A$$

So

$$\begin{aligned} \Sigma_{\text{active}} &= A^{-1}BA^{-1} = A^{-1} \\ &= [(1 - \alpha)\mathbb{E}_{x_1=0}[\sigma(1 - \sigma)xx^T] + \alpha\mathbb{E}[\sigma(1 - \sigma)xx^T]]^{-1} \end{aligned}$$

□

## 6.9. Inverses Without First Coordinate

**Lemma 6.5.**

$$\begin{bmatrix} a & \vec{a}^T \\ \vec{a} & A \end{bmatrix}^{-1} = \begin{bmatrix} b & \vec{b}^T \\ \vec{b} & B \end{bmatrix}$$

Where

$$\begin{aligned} b &= \frac{1}{a - \vec{a}^T A^{-1} \vec{a}} \\ \vec{b} &= -b A^{-1} \vec{a} \\ B &= A^{-1} + b(A^{-1} \vec{a})(A^{-1} \vec{a})^T \end{aligned}$$

*Proof.* Matrix algebra.

□

**Lemma 6.6.**

$$(A^{-1})_{-1} = (A_{-1})^{-1} + \frac{((A_{-1})^{-1} A_{-1,1})(A_{-1})^{-1} A_{-1,1}^T}{A_{1,1} - A_{-1,1}^T (A_{-1})^{-1} A_{-1,1}}$$

*Proof.* Use the above theorem and note that  $b > 0$  so

$$b(A^{-1} \vec{a})(A^{-1} \vec{a})^T \succeq 0$$

□

### 6.10. Relating Err to expectation of sigmoid

**Lemma 6.7.**

$$\frac{Err}{2} < \mathbb{E}[\sigma(1 - \sigma)] < Err$$

*Proof.*

$$\begin{aligned} Err &= P(yx_1 \|w^*\| < 0) \\ &= P(x_1 < 0 \wedge y = 1) + P(x_1 > 0 \wedge y = -1) \end{aligned}$$

From Assumption 7,

$$\begin{aligned} &= \int_{-\infty}^0 p_{x_1}(x_1) \sigma(-w_1^* x_1) + \int_0^{0\infty} p_{x_1}(x_1) \sigma(w_1^* x_1) \\ &= \int_0^{\infty} [p_{x_1}(-x_1) + p_{x_1}(x_1)] \sigma(w_1^* x_1) \end{aligned}$$

Additionally,

$$\begin{aligned} \mathbb{E}[\sigma(1 - \sigma)] &= \mathbb{E}[\sigma(yx_1 \|w^*\|) \sigma(-yx_1 \|w^*\|)] \\ &= \mathbb{E}[\sigma(\|w^*\| x_1) \sigma(-\|w^*\| x_1)] \\ &= \int_{-\infty}^0 p_{x_1}(x_1) \sigma(\|w^*\| x_1) \sigma(-\|w^*\| x_1) + \int_0^{\infty} p_{x_1}(x_1) \sigma(\|w^*\| x_1) \sigma(-\|w^*\| x_1) \\ &= \int_0^{\infty} [p_{x_1}(-x_1) + p_{x_1}(x_1)] \sigma(\|w^*\| x_1) \sigma(-\|w^*\| x_1) \end{aligned}$$

Note that for  $x_1 > 0$ ,  $\frac{1}{2} < \sigma(-\|w^*\| x_1) < 1$ . Comparing equations, we get,

$$\frac{Err}{2} < \mathbb{E}[\sigma(1 - \sigma)] < Err$$

□

### 6.11. Main DE bound

**Theorem 4.1.** For sufficiently small constant  $\alpha$  (that depends on the dataset) and for  $Err < \epsilon < \epsilon_0$ ,

$$DE(\epsilon) > \frac{s}{4Err}$$

*Proof.* For convenience, define

$$\begin{aligned} Q &= \mathbb{E}_{x_1=0}[\sigma(1 - \sigma) x x^T] \\ R &= \mathbb{E}[\sigma(1 - \sigma) x x^T] = COV_{passive} \\ S &= \alpha R + (1 - \alpha) Q = COV_{active} \end{aligned}$$

By the definition of  $s$ ,

$$\mathbb{E}_{x_1=0}[x_{-1} x_{-1}^T] \succeq s \frac{\mathbb{E}[\sigma(1 - \sigma) x_{-1} x_{-1}^T]}{\mathbb{E}[\sigma(1 - \sigma)]}$$

By Lemma 6.7,

$$4Q_{-1} \succ \frac{s}{Err} R_{-1}$$

For small enough  $\alpha$ ,

$$Q_{-1} \succ \frac{s/(4Err) - \alpha}{1 - \alpha} R_{-1}$$

$$\alpha R_{-1} + (1 - \alpha)Q_{-1} \succ \frac{s}{4Err} R_{-1}$$

$$S_{-1} \succ \frac{s}{4Err} R_{-1}$$

$$\frac{s}{4Err} (S_{-1})^{-1} \prec (R_{-1})^{-1} \preceq (R^{-1})_{-1}$$

The last step comes from noting that the right hand side of Lemma 6.6 positive semidefinite for  $A$  positive semidefinite.

Additionally, note that the first row and column of  $Q$  is 0,

so  $S_{-1,1} = \alpha R_{-1,1}$  and  $S_{1,1} = \alpha R_{1,1}$ .

An examination yields,

$$\frac{(S_{-1})^{-1} S_{-1,1})(S_{-1})^{-1} S_{-1,1})^T}{S_{1,1} - S_{-1,1}^T (S_{-1})^{-1} S_{-1,1}} = O(\alpha)$$

Using Lemma 6.6, we find that we can make  $\alpha$  small enough so that

$$\frac{s}{4Err} (S^{-1})_{-1} \prec (R^{-1})_{-1}$$

$$\frac{s}{4Err} COV_{active,-1} \prec COV_{passive,-1}$$

so by Lemma 4.1, for  $Err < \epsilon < \epsilon_0$ ,

$$DE(\epsilon) > \frac{s}{4Err}$$

□

### 6.12. DE Bound Given Decomposition

We actually get a slightly more general result from the following lemma.

**Lemma 6.8.** *If  $p(x) = p(x_1)p(x_{-1})$ , then for sufficiently small constant  $\alpha$  (that depends on the dataset), and for  $Err < \epsilon < \epsilon_0$ ,*

$$\frac{1}{4Err} < DE(\epsilon) < \frac{1}{2Err} \left(1 + \frac{\mathbb{E}[\tilde{X}]}{Var(\tilde{X})}\right)$$

where

$$p(\tilde{X} = x) \propto \sigma(\|w^*\|x)(1 - \sigma(\|w^*\|x))p(x_1 = x)$$

*Proof.* With the decomposition, in the Theorem 4.1,  $s = 1$ . So we get for free that for  $Err < \epsilon < \epsilon_0$ ,

$$DE(\epsilon) > \frac{1}{4Err}$$

As before, for convenience, define

$$\begin{aligned} Q &= \mathbb{E}_{x_1=0}[\sigma(1-\sigma)xx^T] \\ R &= \mathbb{E}[\sigma(1-\sigma)xx^T] = COV_{passive} \\ S &= \alpha R + (1-\alpha)Q = COV_{active} \end{aligned}$$

Because of the decomposition,

$$\begin{aligned} R_{2:,2:} &= \mathbb{E}[\sigma(1-\sigma)]\mathbb{E}[x_2:x_2^T] \succ \frac{Err}{2}\mathbb{E}[x_2:x_2^T] \\ Q_{2:,2:} &= \frac{1}{4}\mathbb{E}[x_2:x_2^T] \\ Q_{2:,2:} &\prec \frac{1}{2Err}R_{2:,2:} \end{aligned}$$

For sufficiently small  $\alpha$ ,

$$\begin{aligned} Q_{2:,2:} &\prec \frac{1/(2Err) - \alpha}{1 - \alpha}R_{2:,2:} \\ \alpha R_{2:,2:} + (1-\alpha)Q_{2:,2:} &\prec \frac{1}{2Err}R_{2:,2:} \\ S_{2:,2:} &\prec \frac{1}{2Err}R_{2:,2:} \end{aligned}$$

Because of the decomposition, and because  $\mathbb{E}[x_2] = 0$  (without loss of generality by translation),

$$\begin{aligned} R_{0:1,2:} &= 0 \\ Q_{0:1,2:} &= 0 \end{aligned}$$

$$\frac{1}{2Err}(A^{-1})_{2:,2:} \succ (R^{-1})_{2:,2:}$$

Now, let us examine the upper left corners,

$$\begin{aligned} R_{0:1,0:1} &= \begin{bmatrix} \mathbb{E}[\sigma(1-\sigma)] & \mathbb{E}[\sigma(1-\sigma)x_1] \\ \mathbb{E}[\sigma(1-\sigma)x_1] & \mathbb{E}[\sigma(1-\sigma)x_1^2] \end{bmatrix} \\ S_{0:1,0:1} &= \begin{bmatrix} (1-\alpha)/4 + \alpha\mathbb{E}[\sigma(1-\sigma)] & \alpha\mathbb{E}[\sigma(1-\sigma)x_1] \\ \alpha\mathbb{E}[\sigma(1-\sigma)x_1] & \alpha\mathbb{E}[\sigma(1-\sigma)x_1^2] \end{bmatrix} \end{aligned}$$

Denote

$$D = \mathbb{E}[\sigma(1-\sigma)]\mathbb{E}[\sigma(1-\sigma)x_1^2] - \mathbb{E}[\sigma(1-\sigma)x_1]^2$$

Then,

$$(R^{-1})_{0,0} = \frac{\mathbb{E}[\sigma(1-\sigma)x_1^2]}{D}$$

$$(S^{-1})_{0,0} = \frac{\alpha\mathbb{E}[\sigma(1-\sigma)x_1^2]}{\alpha(1-\alpha)(1/4)\mathbb{E}[\sigma(1-\sigma)x_1^2] + \alpha^2 D}$$

$$(R^{-1})_{0,0}/(S^{-1})_{0,0} = \frac{1-\alpha}{4\mathbb{E}[\sigma(1-\sigma)]} \left(1 + \frac{\mathbb{E}[\sigma(1-\sigma)x_1^2]}{D}\right) + \alpha$$

For small enough  $\alpha$ ,

$$(R^{-1})_{0,0}/(S^{-1})_{0,0} < \frac{1}{2Err} \left(1 + \frac{\mathbb{E}[\sigma(1-\sigma)x_1^2]}{D}\right)$$

Combining the bounds on the two blocks of the matrices, we get that

$$\frac{1}{2Err} \left(1 + \frac{\mathbb{E}[\sigma(1-\sigma)x_1^2]}{D}\right) (S^{-1})_{-1} \succ (R^{-1})_{-1}$$

$$\frac{1}{2Err} \left(1 + \frac{\mathbb{E}[\sigma(1-\sigma)x_1^2]}{D}\right) COV_{active,-1} \succ COV_{passive,-1}$$

So for  $\epsilon < \epsilon_0$ ,

$$DE(\epsilon) < \frac{1}{2Err} \left(1 + \frac{\mathbb{E}[\sigma(1-\sigma)x_1^2]}{D}\right)$$

if we define  $\tilde{X}$  such that  $p_{\tilde{X}}(x) \propto \sigma(1-\sigma)p_{x_1}(x)$ ,

$$DE(\epsilon) < \frac{1}{2Err} \left(1 + \frac{\mathbb{E}[\tilde{X}]^2}{Var(\tilde{X})}\right)$$

□

**Theorem 4.2.** *If  $p(x) = p(x_1)p(x_{-1})$  and  $p(x_1) = p(-x_1)$ , then for sufficiently small constant  $\alpha$  (that depends on the dataset), and for  $Err < \epsilon < \epsilon_0$ ,*

$$\frac{1}{4Err} < DE(\epsilon) < \frac{1}{2Err}$$

*Proof.* If  $p(x_1) = p(-x_1)$ , then  $p(\tilde{X}) = p(-\tilde{X})$  and so  $\mathbb{E}[\tilde{X}] = 0$ .

Using Lemma 6.8, we arrive at the conclusion. □
